# Supplementary material for: A modular approach to porphyrin oligomers using metal ions as connectorsElectronic supplementary information (ESI) available: preparation and spectroscopic data for compounds 4 and 6. Crystallographic data for the bis-palladium complex shown in Scheme 1. See http://www.rsc.org/suppdata/cc/b1/b109357f/
Source: Royal Society of Chemistry journal article supplement (doi:10.1039/b109357f), 2002-01-24
Supplement: b109357f.doc [file b109357f.doc]

**Electronic Supplementary Information**

**A modular approach to porphyrin oligomers using metal ions as connectors**

S. Richeter, C. Jeandon, R. Ruppert, H.J. Callot

Faculté de Chimie, 1 rue Blaise Pascal, 67008 Strasbourg France.

E-mail : callot@chimie.u-strasbg.fr

**EXPERIMENTAL DATA.**

**Preparation of compound 4 :**

To a solution of **2** (10 mg) in chloroform (30 mL) at 50°C was added dropwise a solution of palladium(II) acetate (3 mg) in chloroform (10 mL). The reaction was monitored by TLC and after all **2** has been consumed, the solvent was evaporated and the residue purified by flash chromatography on silica gel with dichloromethane as eluent. After crystallisation (dichloromethane/methanol), **4** was isolated as a green-brown solid (5 mg, 50 %).

1H NMR (500 MHz, C2D2Cl4, 373K) :  = 1.54 (s, 36H, *t*Bu), 1.60 (s, 36H, *t*Bu), 2.06 (s, 6H, Me), 2.21 (s, 6H, Me), 5.46 (s, 2H, Hacac), 7.75 (broad, 4H, Ar-Hortho), 7.92 (broad, 4H, Ar-Hortho), 7.84 (t, 2H, J = 1.8 Hz, Ar-Hpara), 8.18 (t, 2H, J = 1.8 Hz, Ar-Hpara), cyclised phenyl protons : 7.62 (ddd, 2H, J = 7.7 Hz, 7.7 Hz and 1.1 Hz), 7.83 (ddd, 2H, J = 7.7 Hz, 7.7 Hz and 1.5 Hz), 7.86 (ddd, 2H, J = 8.1 Hz, 7.4 Hz and 1.1 Hz), 7.94 (ddd, 2H, J = 7.4 Hz, 8.1 Hz and 1.5 Hz), 8.43 (dd, 2H, J = 8.1 Hz and 1.5 Hz), 8.50 (dd, 2H, J = 7.7 Hz and 1.1 Hz), 8.51 (dd, 2H, J = 7.4 Hz and 1.1 Hz), 8.78 (dd, 2H, J = 7.7 Hz and 1.5 Hz), and pyrrolic protons 8.15 (broad, 2H), 8.38 (broad, 2H), 8.93 (broad, 4H).

UV/Vis (CH2Cl2) : max/nm ( / 103 L.mol-1.cm-1) : 411 (60.4), 532 (196.6), 682 (52), 784 (19.6), 877 (86.5).

MS (FAB) : m/z : 2468.9, calcd for C134H126N12O8Ni2Pd3 : 2469.2.

**Preparation of compound 6 :**

A solution of **3** (8 mg, 5.8 mol) in chloroform/acetic acid (2 mL/25 mL) was heated under reflux for 3 hours. The solvents were evaporated to dryness and the solid residue dried under vacuum. This residue was dissolved in chloroform (10 mL) and the solution added dropwise under argon to a solution of **2** (6 mg, 5 mol) in chloroform (15 mL) until **2** was consumed. After chromatography (silica gel, hexane/CH2Cl2) and crystallisation from CH2Cl2/MeOH, **6** was obtained as a brown solid (4 mg, 45 %).

1H NMR (500 MHz, C2D2Cl4, 373K) :  = 1.54 (s, 36H, *t*Bu), 1.60 (2s, 2x36H, *t*Bu), 2.06 (s, 6H, Me), 2.21 (s, 6H, Me), 5.47 (s, 2H, Hacac), 7.75 (broad, 6H, Ar-Hortho), 7.92 (broad, 6H, Ar-Hortho), 7.86 (t, 2H, J = 1.8 Hz, Ar-Hpara), 8.18 (2t, 2x2H, J = 1.8 Hz, Ar-Hpara), cyclised phenyl protons : 7.62 (ddd, 2H, J = 8 Hz, 8 Hz and 1 Hz), 7.82 (ddd, 2H, J = 8 Hz, 8 Hz and 1.2 Hz), 7.87 (2ddd, 2x2H, J = 8 Hz, 7.7 Hz and 1 Hz), 7.93 (2ddd, 2x2H, J = 8 Hz, 7.7 Hz and 1.2 Hz), 8.43 (2dd, 2x2H, J = 7.7 Hz and 1.2 Hz), 8.50 (dd, 2H, J = 8 Hz and 1 Hz), 8.52 (2dd, 2x2H, J = 8 Hz and 1 Hz), 8.78 (dd, 2H, J = 8 Hz and 1.2 Hz), and pyrrolic protons 8.18 and 8.95 (broad, 2x2H), 8.40 and 8.97 (2d, 2x2H, 4.9 Hz), 8.17 and 8.93 (2d, 2x2H, 5.2 Hz).

UV/Vis (CH2Cl2) : max/nm ( / 103 L.mol-1.cm-1) : 412 (90.7), 540 (300), 684 (84), 789 (31), 881 (116).

MS (FAB) : m/z : 3551, calcd for C196H182N18O10Ni3Pd4 : 3551.4.

**Crystal data for the bis-palladium complex of a nickel bis-enaminoketoporphyrin :**

Due to poor sample cristallinity (thin plates) and to loss of solvents even at low temperature during recording of the data, the crystal structure is not of the highest quality and one *t*-butyl group was refined isotropically. C295H312Cl2N24Ni4O33Pd8 or 4(C72H70N6O6Pd2).CH2Cl2. 3 H2O. 6 CH3OH, M = 5886.93, triclinic, space group P -1 ; a = 15.8646(3), b = 21.1903(3), c = 23.5426(4) Å, α = 73.875(5)°, β = 77.767(4)°, γ = 86.512(5)°, V = 7430.4(2) Å3, Z = 1, Dc = 1.32 gcm-3. A total of 41471 ±h±k+l reflections was collected on a red crystal of dimensions 0.18*0.14*0.03 mm3, using a KappaCCD diffractometer, graphite monochromated MoKα, 2.5 < θ < 26.38, temperature 174 K. 15140 unique reflections having I > 3 σ(I) were used to determine and refine the structure. Final results: R = 0.066, Rw = 0.100, GOF = 1.654, largest peak in final difference = 1.649 eÅ-3.
